# Supplementary material
Source: PubMed Central journal article supplement (PMC4547223)
Supplement: pnas.201423036SI.pdf [file pnas.201423036SI.pdf]

# Supporting Information

Suthana et al. 10.1073/pnas.1423036112

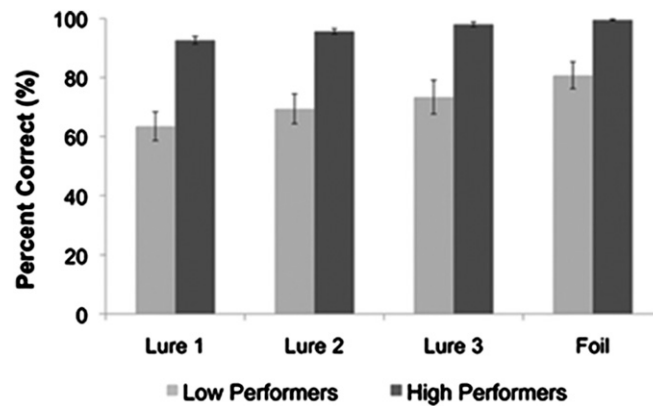

Fig. S1. Shown is percentage correct for the 40 sessions from 25 patients ( $n = 40$ ) split into low and high performers. Lure 1 is the most similar and lure 3 is the least similar photograph to the target photograph, and the foil image is a novel photograph of an unstudied face.

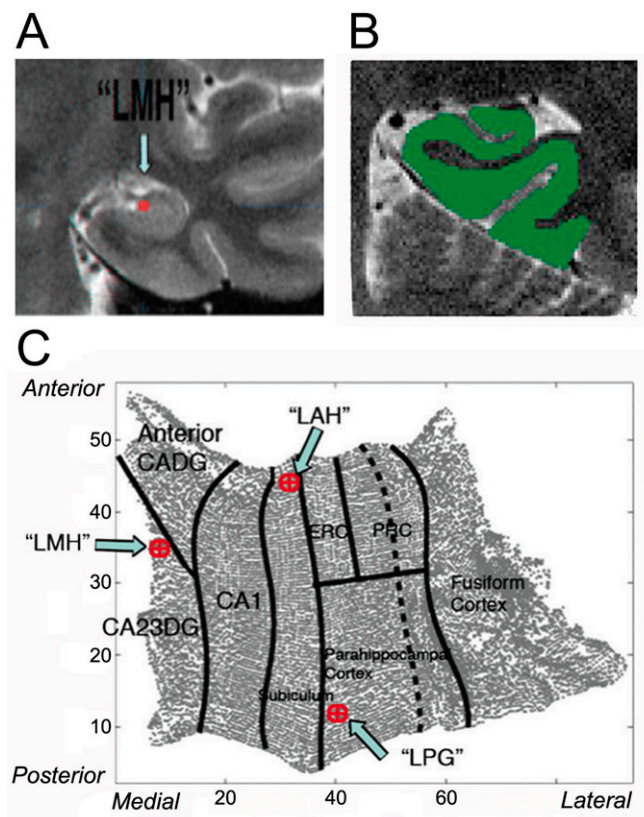

Fig. S2. (A) High-resolution MRI showing a left medial hippocampal (LMH) electrode location. (B) The 3D gray matter of the medial temporal lobe was created by manual segmentation of the gray matter on the high-resolution MRI. (C) An example patient's 2D flat map was created by unfolding the 3D gray matter and projecting electrode locations (shown in red). Regions shown are CA2, CA3, and dentate gyrus (CA23DG), anterior CA fields and dentate gyrus (CADG), CA1, subiculum, entorhinal cortex (ERC), parahippocampal cortex, perirhinal cortex (PRC), and fusiform cortex.

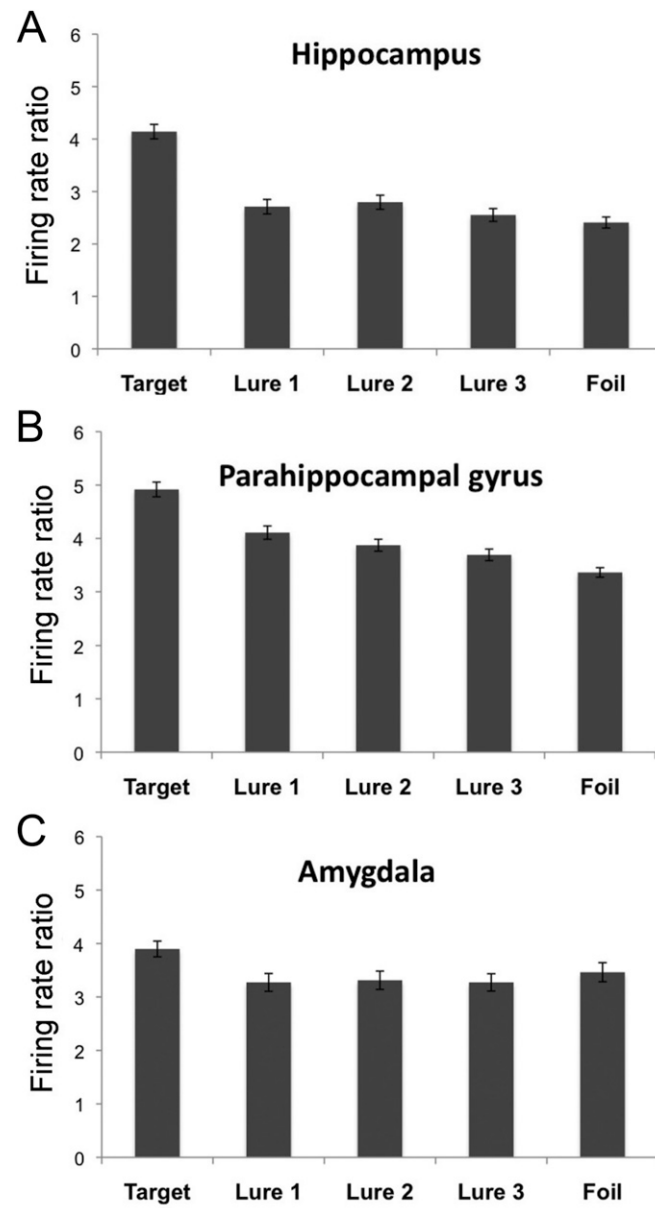

**Fig. S3.** Increase in average firing rate ratio (poststimulus compared with baseline) across all sessions ( $n = 40$ ) during recognition of the target, lures, and foil images in regions hippocampus (A), parahippocampal gyrus (combined entorhinal and parahippocampal cortex) (B), and amygdala (C). Error bars show the SEM.

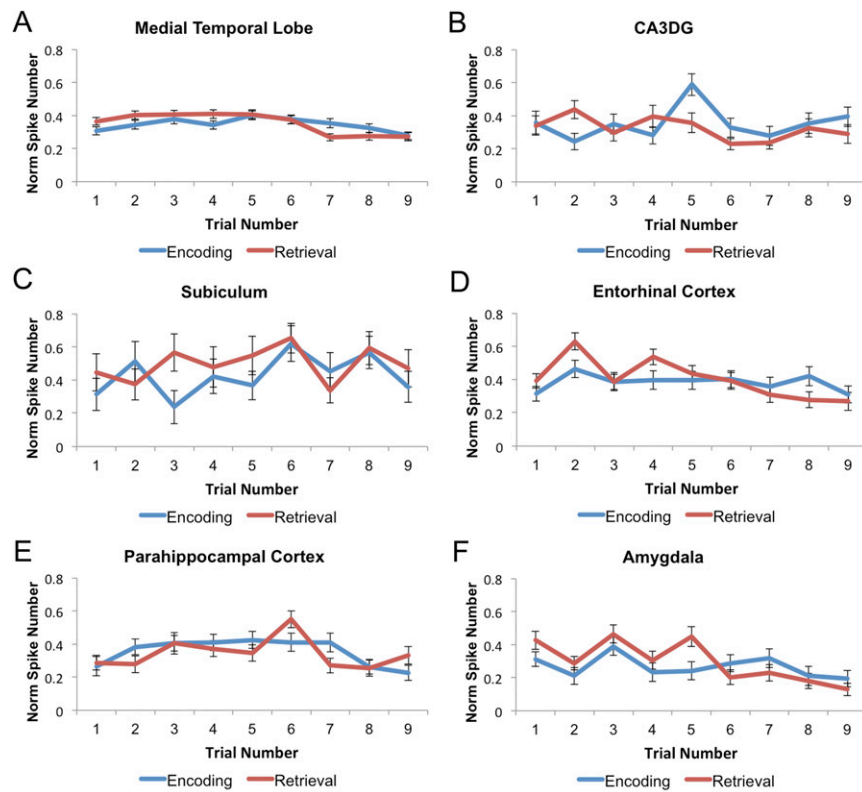

**Fig. S4.** Normalized average number of spikes for each trial during encoding and retrieval. Shown is the average spike counts for all units within the MTL regions (A) as well as within individual MTL areas including the CA3DG (B), subiculum (C), entorhinal cortex (D), parahippocampal cortex (E), and amygdala (F). Error bars reflect SEM.

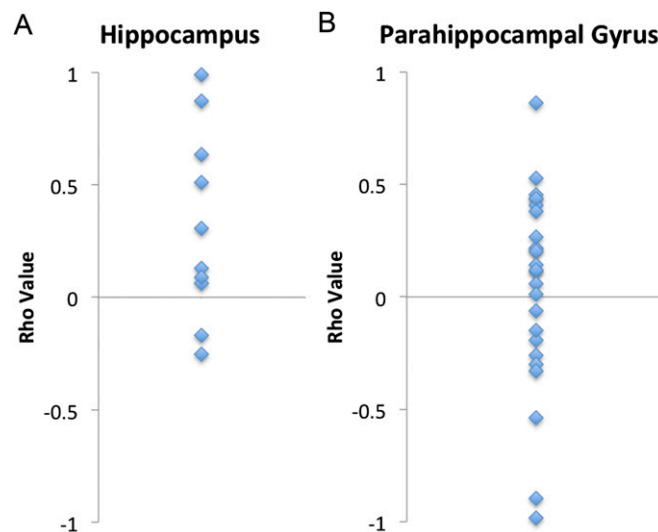

**Fig. S5.** Spearman correlation coefficient values between behavioral discrimination indices and target-lure 1 firing rate changes for specific learned target items within each individual subject. Rho values across subjects were significantly above zero within the (A) hippocampus (average  $\rho = 0.32$ ;  $P < 0.05$ ) but not within the (B) parahippocampal gyrus (average  $\rho = 0.05$ ;  $P > 0.05$ ).

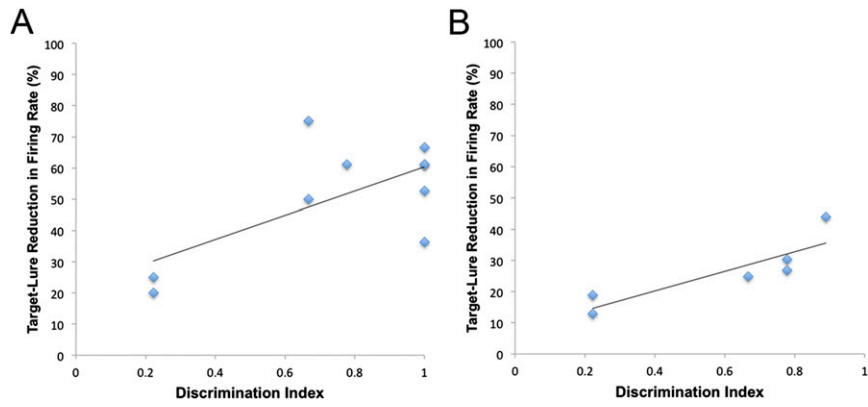

Fig. 56. Two example subjects (*A* and *B*) scatterplots of behavioral discrimination indices and hippocampal target-lure 1 firing rate changes for specific learned target items.

**Table S1. Patient electrode localizations**

| Patient | Placement | Localization | Patient  | Placement | Localization       |
|---------|-----------|--------------|----------|-----------|--------------------|
| #1      | RAH       | CA3DG        | #12      | RAH       | Subiculum          |
|         | LAH       | Subiculum    |          | LAH       | CA3DG              |
|         | LPG       | LPHC         |          | REC       | REC                |
|         | RPG       | RPHC         |          | LEC       | LEC                |
|         | RA        | Amygdala     |          | RA        | Amygdala           |
| #2      | LA        | Amygdala     | #13      | LA        | Amygdala           |
|         | RAH       | RAH          |          | RMH       | Subiculum          |
|         | LAH       | LAH          |          | LMH       | CA3DG              |
|         | LEC       | LEC          |          | REC       | Not in gray matter |
|         | LPG       | LPHC1        |          | LEC       | ERC                |
| #3, #6  | RPG       | LPHC2        | #14      | RA        | Amygdala           |
|         | RA        | RPHC         |          | LA        | Amygdala           |
|         | LA        | Amygdala     |          | RAH       | CA3DG              |
|         | RAH       | CA3DG        |          | LAH       | CA1                |
|         | LAH       | CA3DG        |          | REC       | REC                |
| #4      | RPG       | RPHC         | #15      | LEC       | LEC                |
|         | LPG       | LPHC         |          | RPG       | RPG                |
|         | RA        | Amygdala     |          | LPG       | Fusiform gyrus     |
|         | LA        | Amygdala     |          | RA        | Amygdala           |
|         | RAH       | RAH          |          | LA        | Amygdala           |
| #5      | LAH       | LAH          | #16      | RAH       | CA3DG              |
|         | REC       | REC          |          | LAH       | CA1                |
|         | LEC       | LEC          |          | RA        | Amygdala           |
|         | RPG       | RPHC         |          | LA        | Amygdala           |
|         | LPG       | LPHC         |          | RAH       | Subiculum          |
| #7      | RA        | Amygdala     | #17      | LAH       | Subiculum          |
|         | LA        | Amygdala     |          | REC       | REC                |
|         | RAH       | CA3DG        |          | LEC       | LEC                |
|         | LAH       | CA3DG        |          | RA        | Amygdala           |
|         | RPH       | CA1          |          | LA        | Amygdala           |
| #8      | REC       | REC          | #18      | LMH       | CA3DG              |
|         | LEC       | LEC          |          | REC       | Fusiform gyrus     |
|         | RPG       | RPHC         |          | LEC       | LEC                |
|         | LPG       | LPHC         |          | RAH       | CA3DG              |
|         | RA        | Amygdala     |          | LAH       | CA3DG              |
| #9      | LA        | Amygdala     | #19, #25 | REC       | REC                |
|         | RAH       | CA3DG        |          | LEC       | LEC                |
|         | LAH       | CA3DG        |          | RAH       | CA3DG              |
|         | RPG       | RPHC         |          | LAH       | CA3DG              |
|         | LPG       | LPHC         |          | REC       | REC                |
| #10     | LEC       | LEC          | #20      | LEC       | LEC                |
|         | RA        | Amygdala     |          | RAH       | CA3DG              |
|         | LA        | Amygdala     |          | LAH       | CA3DG              |
|         | RAH       | Subiculum    |          | REC       | REC                |
|         | REC       | REC          |          | LEC       | Subiculum          |
| #11     | LEC       | LEC          | #21      | LEC       | LPHC               |
|         | RPG       | RPHC         |          | LPG       | LPHC               |
|         | RAH       | CA3DG        |          | RMH       | CA3DG              |
|         | REC       | REC          |          | LMH       | CA3DG              |
|         | LPG       | LPHC         |          | REC       | REC                |
| #12     | RAH       | CA3DG        | #22      | LEC       | LEC                |
|         | LAH       | Subiculum    |          | RAH       | Amygdala           |
|         | LEC       | LEC          |          | LA        | Amygdala           |
|         | RPG       | RPHC         |          | RAH       | CA3DG              |
|         | RA        | Amygdala     |          | LAH       | CA3DG              |
| #13     | LA        | Amygdala     | #23      | REC       | REC                |
|         | RAH       | CA3DG        |          | RAH       | CA3DG              |
|         | LAH       | CA3DG        |          | LAH       | CA3DG              |
|         | RPG       | RPHC         |          | REC       | Subiculum          |
|         | LA        | Amygdala     |          | LPG       | LPHC               |
| #14     | RAH       | CA3DG        | #24      | REC       | CA3DG              |
|         | LAH       | CA3DG        |          | LMH       | CA3DG              |
|         | RPG       | RPHC         |          | REC       | REC                |
|         | LPG       | LPHC         |          | LEC       | Subiculum          |
|         | RA        | Amygdala     |          | RPG       | RPHC               |
| #15     | LA        | Amygdala     | #24      | LPG       | LPG                |
|         | RAH       | CA3DG        |          | RAH       | CA3DG              |
|         | LAH       | CA3DG        |          | LAH       | Not in gray matter |
|         | RPG       | RPHC         |          | LAH       | Not in gray matter |
|         | LA        | Amygdala     |          |           |                    |

**Table S1. Cont.**

| Patient | Placement | Localization | Patient | Placement | Localization |
|---------|-----------|--------------|---------|-----------|--------------|
| #11     | LPG       | LPHC         |         | REC       | REC          |
|         | RA        | Amygdala     |         | LEC       | LEC          |
|         | LA        | Amygdala     |         | RPG       | RPHC         |
|         | RAH       | CA3DG        |         | LPG       | LPHC         |
|         | LAH       | CA3DG        |         | LA        | Amygdala     |
|         | REC       | REC          |         |           |              |
|         | LEC       | Subiculum    |         |           |              |
|         | RPG       | RPHC         |         |           |              |
|         | LPG       | LPHC         |         |           |              |
|         | RA        | Amygdala     |         |           |              |
| LA      | Amygdala  |              |         |           |              |

Region placements shown are right and left anterior, medial, or posterior hippocampus (RAH, LAH, RMH, LMH, RPH, LPH), right and left parahippocampal cortex (RPHC and LPHC), right and left entorhinal cortex (REC and LEC), and right and left amygdala (RA and LA). Electrodes from 22 of 25 subjects were further localized to the encompassing hippocampal subregions CA3 and dentate gyrus (CA3DG), CA1, or subiculum.

**Table S2. Demographics and clinical characteristics of low and high performers**

|                  | Age          | Sex          | WAIS<br>VIQ  | WAIS<br>digit span | WMS<br>verbal memory | CVLT<br>verbal memory | Rey-Osterrieth<br>visual memory | Trails B<br>executive |
|------------------|--------------|--------------|--------------|--------------------|----------------------|-----------------------|---------------------------------|-----------------------|
| <b>LP (mean)</b> | <b>31.75</b> | <b>7 (5)</b> | <b>90.1</b>  | <b>27.17</b>       | <b>18.17*</b>        | <b>14.33*</b>         | <b>9</b>                        | <b>29.2</b>           |
| SEM              | 3.23         |              | 4.27         | 9.05               | 4.16                 | 5.96                  | 7.67                            | 10.08                 |
| <b>HP (mean)</b> | <b>34.62</b> | <b>6 (5)</b> | <b>98.09</b> | <b>44.17</b>       | <b>59.82*</b>        | <b>53.82*</b>         | <b>29.3</b>                     | <b>20.18</b>          |
| SEM              | 3.23         |              | 5.24         | 9.97               | 7.89                 | 6.88                  | 7.71                            | 8.32                  |

Shown are the average (bolded) and SE (SEM) of the ages and neuropsychological test scores in both groups. Under sex, is shown the number of male and female (in parentheses) participants within each group. Verbal IQ (VIQ) and digit span (attention) scores (percentiles shown) were calculated by using the Wechsler Adult Intelligence Scale (WAIS). Long-term verbal memory percentiles were calculated by using the Wechsler Memory Scale (WMS) and California Verbal Learning Test (CVLT) and executive function by means of the Trail Making Test. The asterisks (\*) indicate significant differences between low performers (LP) and high performers (HP).

**Table S3. Number of recorded units**

| Region                 | Multi-units | Single-units | Total units |
|------------------------|-------------|--------------|-------------|
| Hippocampus            | 105         | 180          | 285         |
| CA3DG                  | (62)        | (117)        | (179)       |
| CA1                    | (9)         | (7)          | (16)        |
| Subiculum              | (34)        | (56)         | (90)        |
| Entorhinal cortex      | 111         | 141          | 252         |
| Parahippocampal cortex | 88          | 138          | 226         |
| Amygdala               | 176         | 237          | 413         |
| Total                  | 480         | 696          | 1,176       |

A total of 1,176 units were recorded from, with 285 in the hippocampus (179 in CA3 and dentate gyrus, 16 in CA1, and 90 in the subiculum), 252 in the entorhinal cortex, 226 in the parahippocampal cortex, and 413 in the amygdala. All performers ( $n = 40$  sessions).

**Table S4. Number of units in hippocampal CA3DG and subiculum regions, entorhinal cortex, parahippocampal cortex, and amygdala recorded from low performers**

| Region                 | Multi-units | Single-units | Total units |
|------------------------|-------------|--------------|-------------|
| Hippocampus            | 47          | 82           | 129         |
| CA3DG                  | (28)        | (55)         | (83)        |
| CA1                    | (3)         | (1)          | (4)         |
| Subiculum              | (7)         | (16)         | (23)        |
| Entorhinal cortex      | 50          | 83           | 133         |
| Parahippocampal cortex | 43          | 66           | 109         |
| Amygdala               | 79          | 136          | 215         |
| Total                  | 204         | 343          | 586         |

Low performers ( $n = 20$ ).

**Table S5. Number of units in hippocampal CA3DG and subiculum regions, entorhinal cortex, parahippocampal cortex, and amygdala recorded from high performers**

| Region                 | Multi-units | Single-units | Total units |
|------------------------|-------------|--------------|-------------|
| Hippocampus            | 58          | 98           | 156         |
| CA3DG                  | (32)        | (55)         | (87)        |
| CA1                    | (4)         | (3)          | (7)         |
| Subiculum              | (20)        | (26)         | (46)        |
| Entorhinal cortex      | 61          | 58           | 119         |
| Parahippocampal cortex | 45          | 72           | 117         |
| Amygdala               | 97          | 101          | 198         |
| Total                  | 251         | 298          | 590         |

High performers ( $n = 20$ ).
